# Supplementary material for: Natural variants of human SARM1 cause both intrinsic and dominant loss-of-function influencing axon survival
Source: PubMed Central journal article supplement (PMC9381744; doi:10.1038/s41598-022-18052-8), 2022-08-16

## **Supplementary Information**

Natural variants of human SARM1 cause both intrinsic and dominant loss-of-function influencing axon survival

Mirlinda Ademi, Xiuna Yang, Michael P. Coleman, and Jonathan Gilley\*

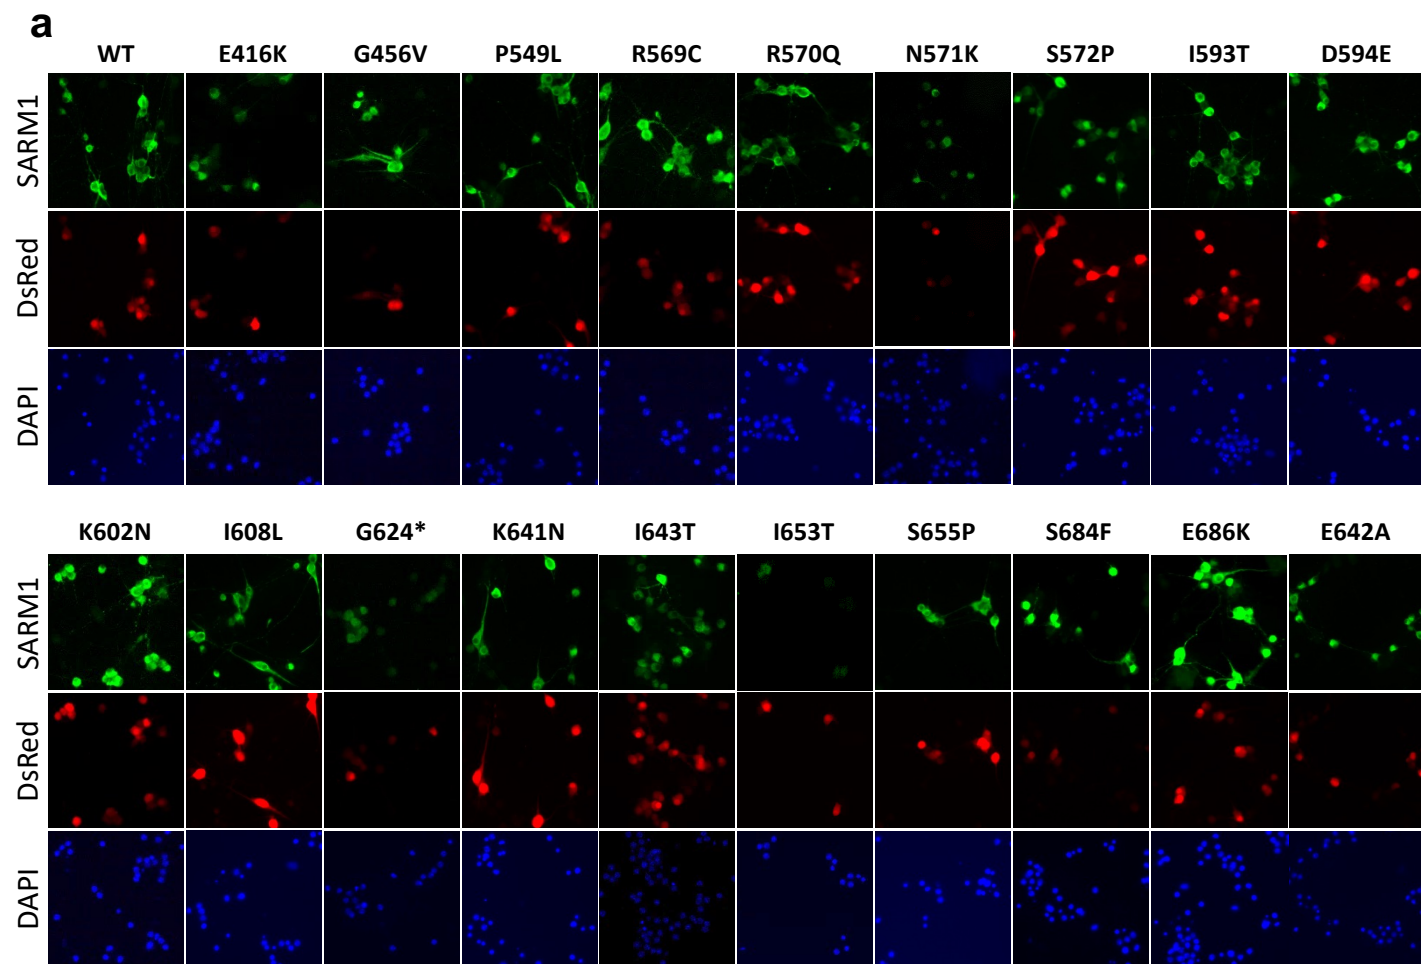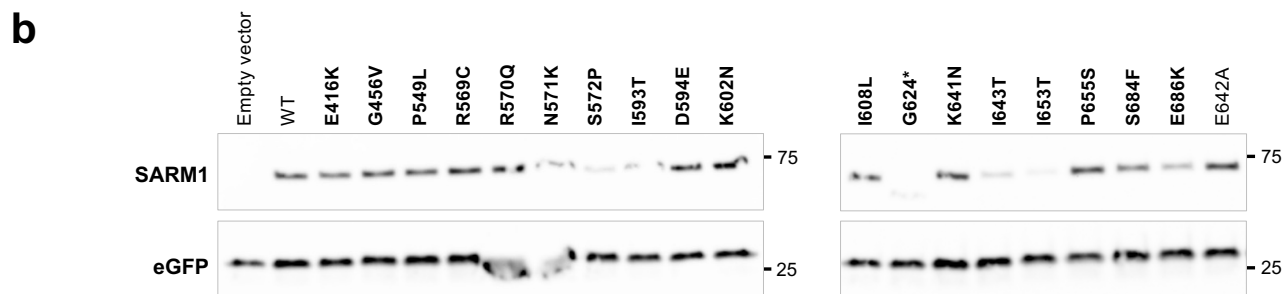

**Supplementary Figure 1.** Expression of SARM1 variants from pCMV-Tag4-based constructs used for microinjection into SCG neurons.

(a) *Sarm1*<sup>-/-</sup> SCG neurons were co-injected with 25 ng/μl pCMV-Tag4-based expression constructs for untagged WT or variant human SARM1 and 25 ng/μl pDsRed2 encoding DsRed protein. Neurons were immunostained with a SARM1 antibody 24 h after injection, followed by nuclear counterstaining with DAPI. Representative images of SARM1 immunostaining, DsRed fluorescence (as a marker for injected neurons), and DAPI staining are shown for each SARM1 variant, as indicated.

(b) Representative immunoblots (of at least n = 4) of extracts of HEK 293T cells 24 h after co-transfection with 0.75 μg pCMV-Tag4-based expression constructs for untagged WT or variant human SARM1 and 0.25 μg pEGFP-C1 encoding eGFP protein (total 1 μg DNA transfected). Blots were probed with antibodies for SARM1 (~70 kDa) and eGFP (~26 kDa, acting as a control for transfection efficiency). All SARM1 variants are expressed and are of the expected size. As in previous experiments (Fig. 2d), G624\* SARM1 expression is very low.

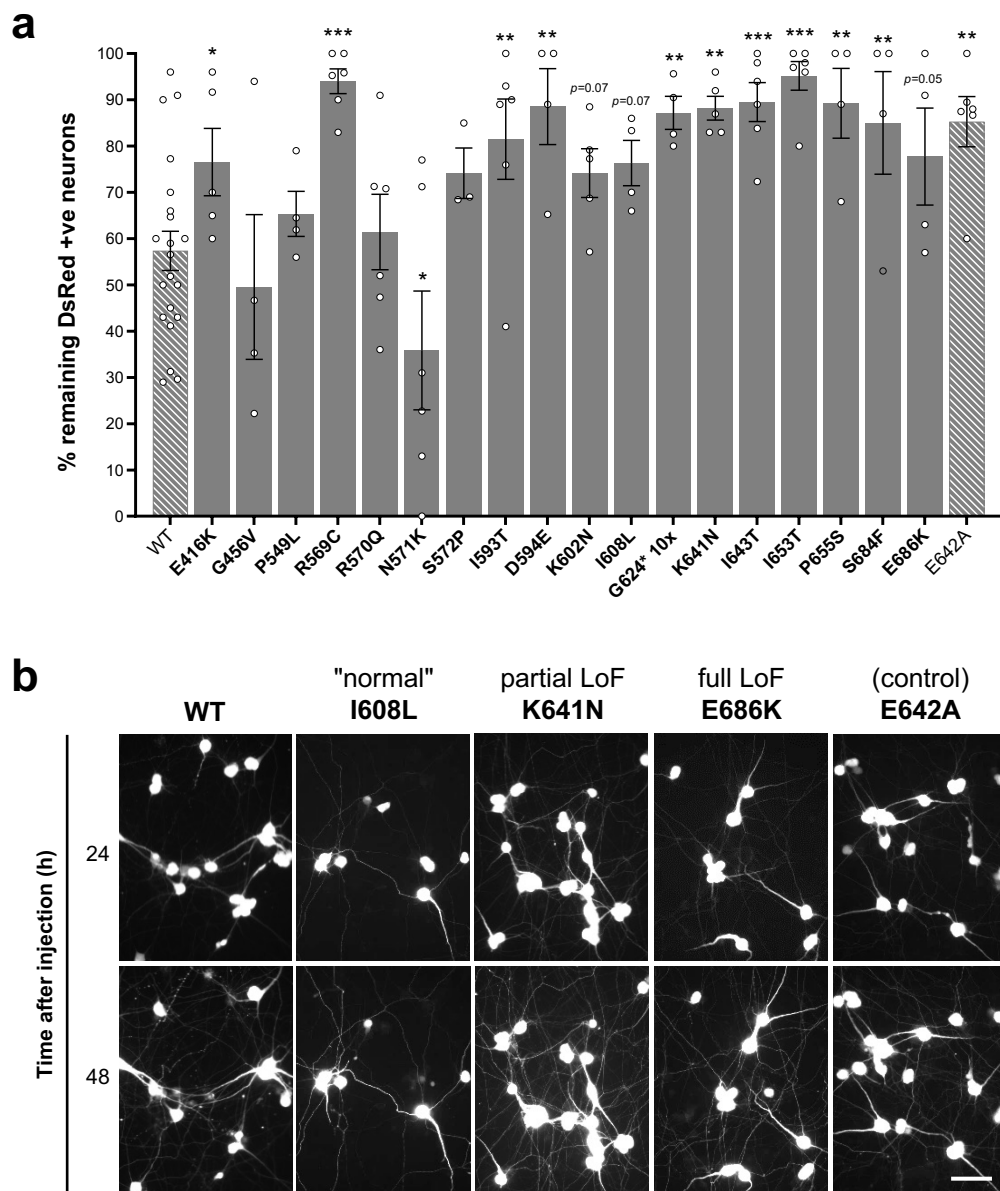

**Supplementary Figure 2.** Natural human SARM1 variants with a LoF phenotype do not affect cytotoxicity.

(a) Survival of the injected *Sarm1*<sup>-/-</sup> SCG neurons described in Fig. 4A. Loss of injected neurons was determined by comparing cell body size and shape, as revealed by DsRed labelling, at 24 h and 48 h after injection, as has been described previously (Gilley & Coleman, 2010). The number of morphologically normal cell bodies at 48 h post microinjection is shown as a percentage of the total number of those present at 24 h. Means  $\pm$ SEM and individual data points ( $n = 3$ -20) are plotted. \*  $p < 0.05$ , \*\*  $p < 0.01$ , \*\*\*  $p < 0.001$ , multiple pairwise comparisons to WT SARM1 with a FDR correction.

(b) Representative fluorescence images, as used for the quantification shown in part a, of microinjected *Sarm1*<sup>-/-</sup> neuronal cell bodies injected with constructs expressing WT or variant/mutant SARM1 (as indicated) at 24 and 48 h after injection. As in Figure 4, controls (wild-type and enzyme-dead E642A SARM1) and three exemplary phenotypes are shown: I608L SARM1 resembling wild-type SARM1 ("normal"), K641N SARM1 displaying a partial LoF phenotype, and E686K SARM1 displaying full LoF. Scale bar, 50  $\mu$ m.

# Uncropped immunoblot images for Figure 2D

**Top panels:** Top half of membrane probed for Flag (SARM1)

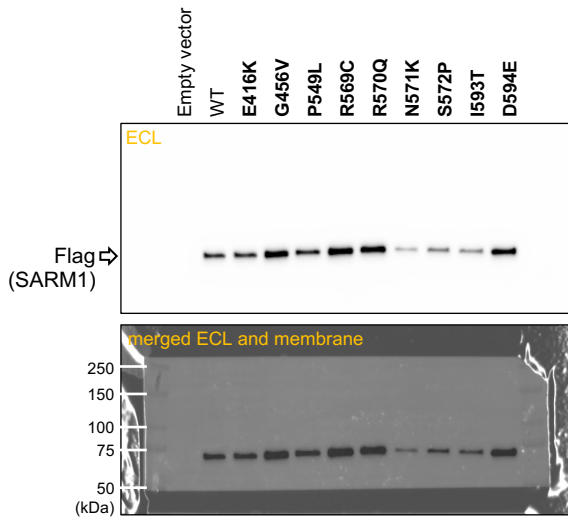

Bottom half of membrane probed simultaneously for GAPDH and ZsGreen

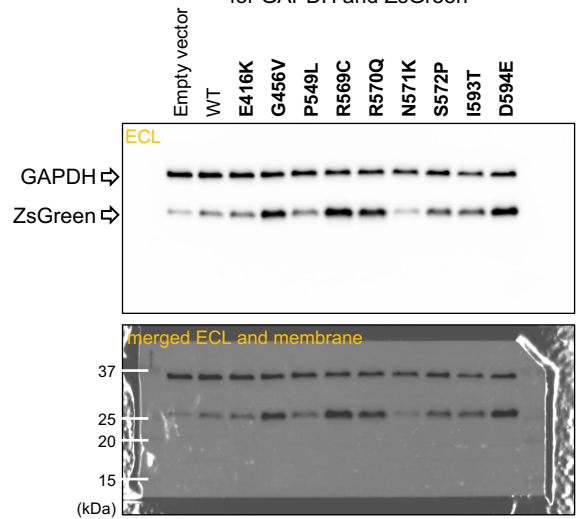

**Bottom panels:** Top half of membrane probed for Flag (SARM1)

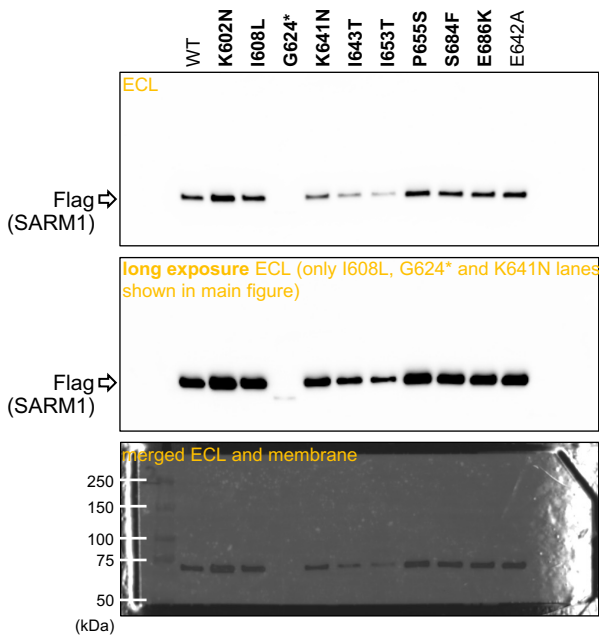

Bottom half of membrane probed sequentially for GAPDH and ZsGreen

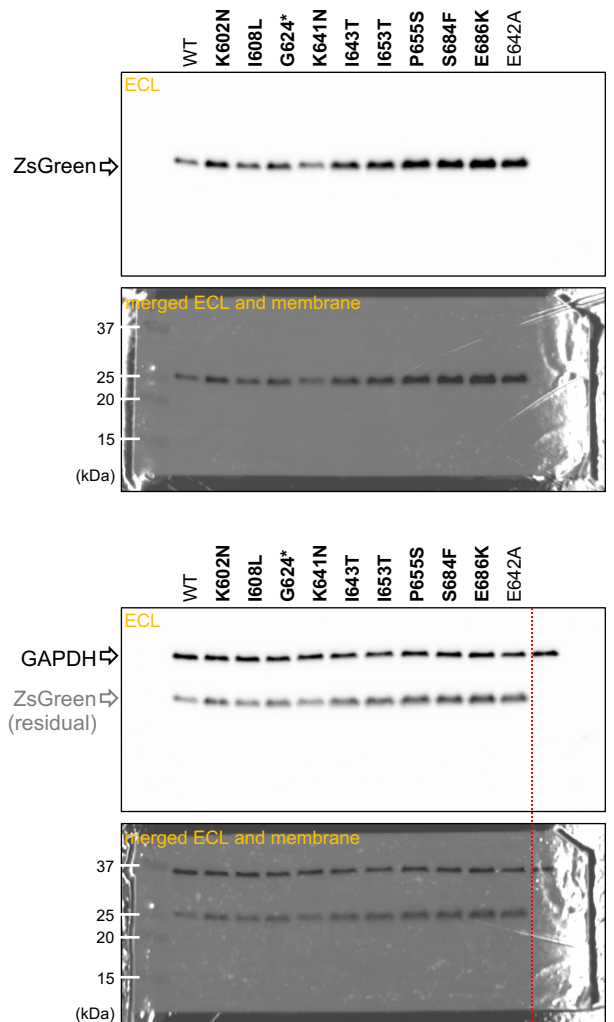

last lane not included in main figure

# Uncropped immunoblot images for Supplementary Figure 1B

Membranes probed simultaneously for SARM1 and GFP

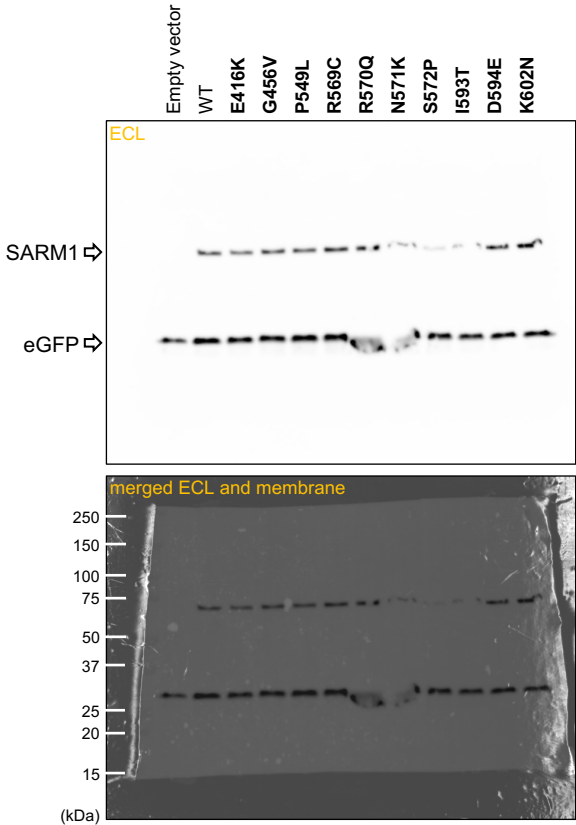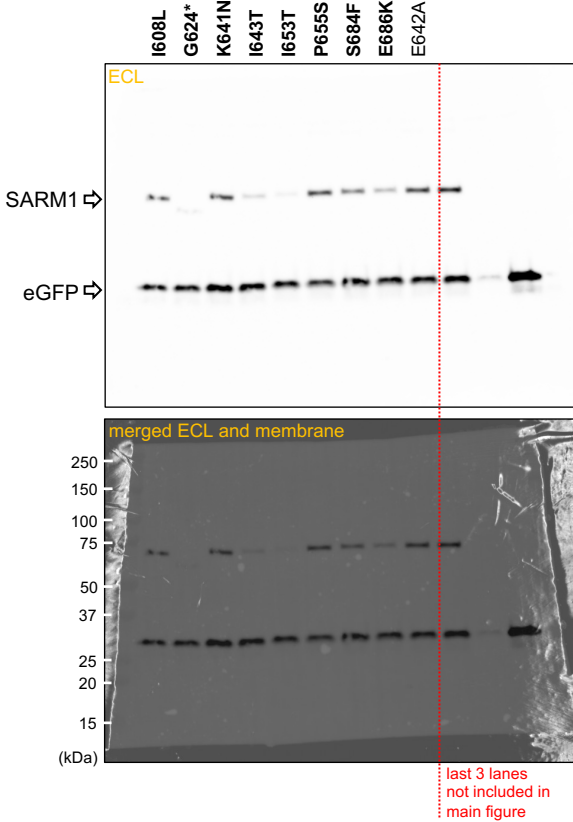

Supplement: 41598_2022_18052_MOESM1_ESM.pdf [file 41598_2022_18052_MOESM1_ESM.pdf]
